# Supplementary material
Source: PubMed Central journal article supplement (PMC7220800)

Figure 4A

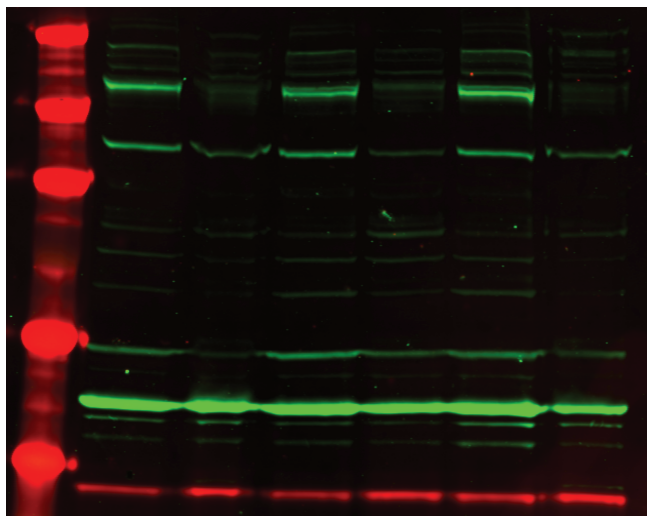

Figure 4F

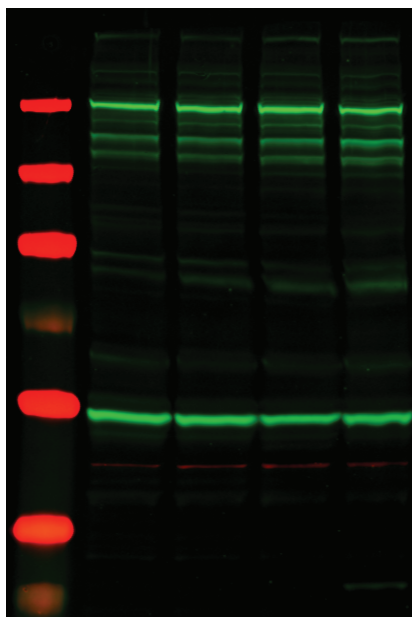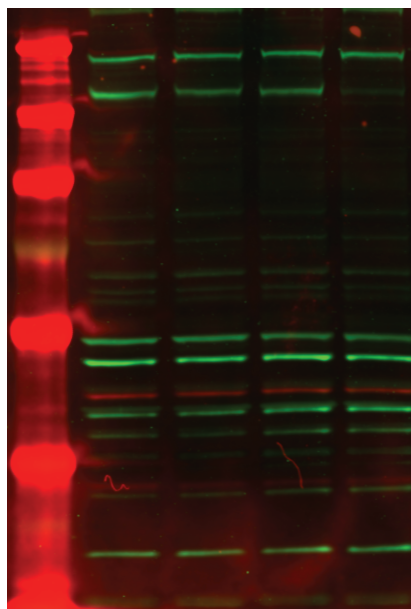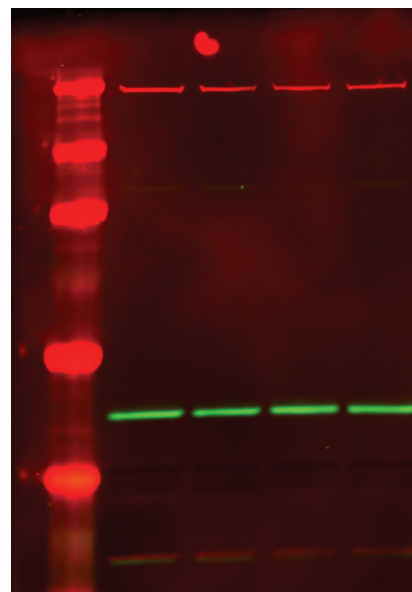

Figure 4I

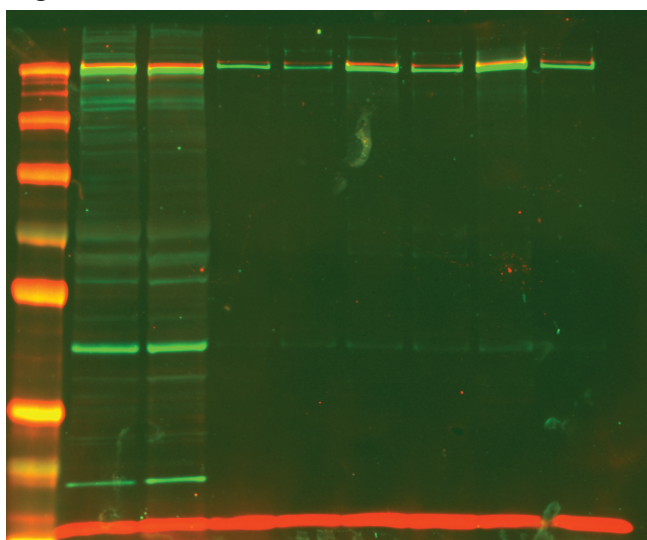

Supplement: NIHMS1539805-supplement-Source_Data_1_Fig4.pdf [file NIHMS1539805-supplement-Source_Data_1_Fig4.pdf]

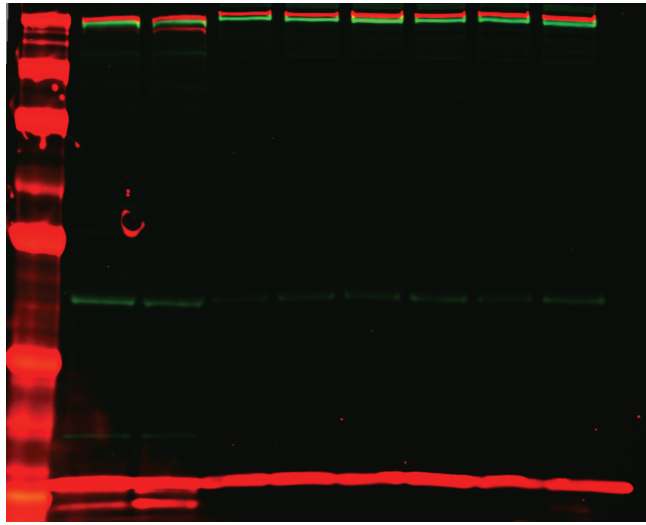

Supplement: NIHMS1539805-supplement-Source_Data_2_ED9.pdf [file NIHMS1539805-supplement-Source_Data_2_ED9.pdf]
